# Supplementary material
Source: publisher figshare collection journal article supplement (https://brill.figshare.com/articles/dataset/_/20471541)
Supplement: Supplementary file 2 [file 1]

Unravelling the cryptic diversity and evolution of the dwarf  
swamp frog *Pseudopaludicola mystacalis* (Anura,  
Leptodactylidae) in open habitats of South America

Clara Ribeiro Porto<sup>1,\*</sup>, Cecil Pergentino Fazolato<sup>2</sup>, Ricardo Marques<sup>3</sup>, Henrique  
Batalha-Filho<sup>2</sup>, Marcelo Felgueiras Napoli<sup>2</sup>, Adrian Antonio Garda<sup>4</sup>, Maria Luiza  
Silveira de Carvalho<sup>1,2</sup>, Flora Maria de Campos Fernandes<sup>1,2</sup>

1 - Universidade Federal da Bahia, Programa de Pós-Graduação em Genética e Biodiversidade, Instituto  
de Biologia, Rua Barão de Jeremoabo, s/n, 40170-115, Ondina, Salvador, Bahia, Brazil

2 - Universidade Federal da Bahia, Programa de Pós-Graduação em Biodiversidade e Evolução, Instituto  
de Biologia, Rua Barão de Jeremoabo, s/n, 40170-115, Ondina, Salvador, Bahia, Brazil

3 - Universidade do Estado de Mato Grosso, 78690-000, Nova Xavantina, Mato Grosso, Brazil

4 - Universidade Federal do Rio Grande do Norte, Centro de Biociências, Departamento de Botânica e  
Zoologia, Avenida Senador Salgado Filho, S/N, Lagoa Nova, 59078-900, Natal, RN, Brazil

\*Corresponding author; e-mail: clararp28@gmail.com

ORCID iDs: Porto: 0000-0002-5895-3870; Fazolato: 0000-0001-6829-9895; Marques: 0000-0002-4632-  
8808; Batalha-Filho: 0000-0001-7191-2814; Napoli: 0000-0003-3843-0543; Garda: 0000-0002-1178-  
1207; de Carvalho: 0000-0002-6887-2062; de Campos Fernandes: 0000-0003-0383-7984

**Supplementary material**

**Table S1.** List of 16S mitochondrial gene samples used in this study. Species name, locality (country: state or province: municipality or locality), haplotypes, tissue or specimen voucher, and Genbank deposit number. Collection acronyms: AAGARDA, Coleção do Laboratório de Anfíbios e Répteis, Universidade Federal do Rio Grande do Norte, Natal, RN, Brazil; CHECOA, Coleção Herpetológica do Centro de Ecologia e Conservação Animal, Universidade Católica do Salvador, BA, Brazil; CFBH, Coleção "Célio F. B. Haddad", Universidade Estadual Paulista, Rio Claro, SP, Brazil; CZUFMT, Coleção Zoológica da UFMT – Setor Herpetologia-Amphibia, Universidade Federal de Mato Grosso, Cuiabá, MT, Brasil; DZSJRP, Departamento de Zoologia e Botânica, Universidade Estadual Paulista, São José do Rio Preto, SP, Brazil; UFBA, Museu de História Natural da Universidade Federal da Bahia, Salvador, BA, Brazil; ZUEC, Museu de Zoologia da Universidade Estadual de Campinas, SP, Brasil; LGE, Laboratório de Genética Evolutiva, Posadas, Misiones, Argentina.

| Species                            | Locality              | h   | Voucher | Genbank  |
|------------------------------------|-----------------------|-----|---------|----------|
| <i>Pseudopaludicola mystacalis</i> | Argentina: Capital    | H28 | LGE5943 | ON152720 |
| <i>Pseudopaludicola mystacalis</i> | Argentina: Capital    | H28 | LGE5944 | ON152721 |
| <i>Pseudopaludicola mystacalis</i> | Argentina: Capital    | H30 | LGE5946 | ON152722 |
| <i>Pseudopaludicola mystacalis</i> | Argentina: Capital    | H30 | LGE5947 | ON152723 |
| <i>Pseudopaludicola mystacalis</i> | Argentina: Concepcion | H30 | LGE2691 | ON152724 |

|                                    |                         |     |           |          |
|------------------------------------|-------------------------|-----|-----------|----------|
| <i>Pseudopaludicola mystacalis</i> | Argentina: Concepcion   | H28 | LGE3014   | ON152725 |
| <i>Pseudopaludicola mystacalis</i> | Argentina: Concepcion   | H30 | LGE3017   | ON152726 |
| <i>Pseudopaludicola mystacalis</i> | Argentina: General Paz  | H28 | LGE1550   | ON152727 |
| <i>Pseudopaludicola mystacalis</i> | Argentina: General Paz  | H28 | LGE1551   | ON152728 |
| <i>Pseudopaludicola mystacalis</i> | Argentina: General Paz  | H29 | LGE1552   | ON152729 |
| <i>Pseudopaludicola mystacalis</i> | Argentina: General Paz  | H30 | LGE1740   | ON152730 |
| <i>Pseudopaludicola mystacalis</i> | Argentina: Ituzaingó    | H28 | LGE1549   | ON152731 |
| <i>Pseudopaludicola mystacalis</i> | Argentina: Ituzaingó    | H28 | LGE2685   | ON152732 |
| <i>Pseudopaludicola mystacalis</i> | Argentina: San Miguel   | H28 | LGE1735   | ON152733 |
| <i>Pseudopaludicola mystacalis</i> | Argentina: San Miguel   | H31 | LGE1739   | ON152734 |
| <i>Pseudopaludicola mystacalis</i> | Brazil: Bahia: Camaçari | H1  | UFBA12696 | ON152735 |
| <i>Pseudopaludicola mystacalis</i> | Brazil: Bahia: Camaçari | H2  | UFBA12697 | ON152736 |
| <i>Pseudopaludicola mystacalis</i> | Brazil: Bahia: Camaçari | H5  | UFBA12549 | ON152737 |
| <i>Pseudopaludicola mystacalis</i> | Brazil: Bahia: Camaçari | H5  | UFBA12550 | ON152738 |
| <i>Pseudopaludicola mystacalis</i> | Brazil: Bahia: Camaçari | H6  | UFBA12551 | ON152739 |

|                                    |                                       |     |             |          |
|------------------------------------|---------------------------------------|-----|-------------|----------|
| <i>Pseudopaludicola mystacalis</i> | Brazil: Bahia: Conde                  | H4  | CHECOA3323  | ON152740 |
| <i>Pseudopaludicola mystacalis</i> | Brazil: Bahia: Conde                  | H3  | CHECOA3326  | ON152741 |
| <i>Pseudopaludicola mystacalis</i> | Brazil: Bahia: Formosa do Rio Preto   | H33 | UFBA447     | ON152742 |
| <i>Pseudopaludicola mystacalis</i> | Brazil: Goiás: Uruacu                 | H35 | CZUFMT778   | ON152743 |
| <i>Pseudopaludicola mystacalis</i> | Brazil: Maranhão: Barreirinhas        | H18 | ZUEC13836   | KJ147005 |
| <i>Pseudopaludicola mystacalis</i> | Brazil: Maranhão: Barreirinhas        | H18 | ZUEC13837   | KJ147006 |
| <i>Pseudopaludicola mystacalis</i> | Brazil: Maranhão: Barreirinhas        | H18 | ZUEC13838   | KJ147007 |
| <i>Pseudopaludicola mystacalis</i> | Brazil: Maranhão: Barreirinhas        | H18 | ZUEC13872   | KJ147019 |
| <i>Pseudopaludicola mystacalis</i> | Brazil: Maranhão: Barreirinhas        | H20 | ZUEC13873   | KJ147021 |
| <i>Pseudopaludicola mystacalis</i> | Brazil: Maranhão: Barreirinhas        | H19 | ZUEC20542   | KJ147020 |
| <i>Pseudopaludicola mystacalis</i> | Brazil: Maranhão: Urbano Santos       | H7  | ZUEC13868   | KJ147044 |
| <i>Pseudopaludicola mystacalis</i> | Brazil: Maranhão: Urbano Santos       | H8  | ZUEC13869   | KJ146981 |
| <i>Pseudopaludicola mystacalis</i> | Brazil: Maranhão: Urbano Santos       | H9  | CFBH35858   | KJ146982 |
| <i>Pseudopaludicola mystacalis</i> | Brazil: Mato Grosso do Sul: Paranaíba | H27 | CFBH-T1374  | KJ147009 |
| <i>Pseudopaludicola mystacalis</i> | Brazil: Mato Grosso: Carceres         | H38 | CZUFMT13669 | ON152744 |

|                                    |                                   |     |             |          |
|------------------------------------|-----------------------------------|-----|-------------|----------|
| <i>Pseudopaludicola mystacalis</i> | Brazil: Mato Grosso: Carceres     | H39 | CZUFMT13670 | ON152745 |
| <i>Pseudopaludicola mystacalis</i> | Brazil: Mato Grosso: Cuiabá       | H36 | ZUEC14147   | KJ146983 |
| <i>Pseudopaludicola mystacalis</i> | Brazil: Mato Grosso: Cuiabá       | H36 | ZUEC14148   | KJ146984 |
| <i>Pseudopaludicola mystacalis</i> | Brazil: Mato Grosso: Cuiabá       | H37 | ZUEC14149   | KJ146985 |
| <i>Pseudopaludicola mystacalis</i> | Brazil: Mato Grosso: Poconé       | H36 | ZUEC14160   | KJ146991 |
| <i>Pseudopaludicola mystacalis</i> | Brazil: Minas Gerais: Januária    | H33 | MTJ0478     | ON152746 |
| <i>Pseudopaludicola mystacalis</i> | Brazil: Minas Gerais: Januária    | H34 | MTJ0479     | ON152747 |
| <i>Pseudopaludicola mystacalis</i> | Brazil: Minas Gerais: Uberlandia  | H32 | ZUEC14128   | KJ146999 |
| <i>Pseudopaludicola mystacalis</i> | Brazil: Minas Gerais: Uberlandia  | H32 | ZUEC14129   | KJ147000 |
| <i>Pseudopaludicola mystacalis</i> | Brazil: Minas Gerais: Uberlandia  | H32 | ZUEC14130   | KJ147001 |
| <i>Pseudopaludicola mystacalis</i> | Brazil: Pará: Primavera           | H22 | CZUFMT235   | ON152748 |
| <i>Pseudopaludicola mystacalis</i> | Brazil: Pará: Primavera           | H21 | CZUFMT115   | ON152749 |
| <i>Pseudopaludicola mystacalis</i> | Brazil: Pará: Primavera           | H22 | CZUFMT218   | ON152750 |
| <i>Pseudopaludicola mystacalis</i> | Brazil: Rio Grande do Norte: Ares | H14 | AAGARDA3238 | ON152751 |
| <i>Pseudopaludicola mystacalis</i> | Brazil: Rio Grande do Norte: Ares | H13 | AAGARDA3237 | ON152752 |

|                                    |                                                       |     |             |          |
|------------------------------------|-------------------------------------------------------|-----|-------------|----------|
| <i>Pseudopaludicola mystacalis</i> | Brazil: Rio Grande do Norte: Ares                     | H12 | AAGARDA3240 | ON152753 |
| <i>Pseudopaludicola mystacalis</i> | Brazil: Rio Grande do Norte: Canguaretama             | H12 | AAGARDA2647 | ON152754 |
| <i>Pseudopaludicola mystacalis</i> | Brazil: Rio Grande do Norte: Canguaretama             | H17 | AAGARDA2619 | ON152755 |
| <i>Pseudopaludicola mystacalis</i> | Brazil: Rio Grande do Norte: Goianinha                | H16 | AAGARDA2397 | ON152756 |
| <i>Pseudopaludicola mystacalis</i> | Brazil: Rio Grande do Norte: Goianinha                | H15 | AAGARDA3137 | ON152757 |
| <i>Pseudopaludicola mystacalis</i> | Brazil: Rio Grande do Norte: Nisia Floresta           | H10 | AAGARDA6218 | ON152758 |
| <i>Pseudopaludicola mystacalis</i> | Brazil: Rio Grande do Norte: Nisia Floresta           | H11 | AAGARDA6219 | ON152759 |
| <i>Pseudopaludicola mystacalis</i> | Brazil: Rio Grande do Norte: Nisia Floresta           | H12 | AAGARDA6214 | ON152760 |
| <i>Pseudopaludicola mystacalis</i> | Brazil: São Paulo: Icém                               | H24 | DZSJRP8724  | KJ147028 |
| <i>Pseudopaludicola mystacalis</i> | Brazil: São Paulo: Icém                               | H23 | DZSJRP8725  | KJ147038 |
| <i>Pseudopaludicola mystacalis</i> | Brazil: São Paulo: Icém                               | H23 | DZSJRP8726  | KJ147037 |
| <i>Pseudopaludicola mystacalis</i> | Brazil: São Paulo: Santa Fé do Sul                    | H26 | DZSJRP8694  | KJ147023 |
| <i>Pseudopaludicola mystacalis</i> | Brazil: São Paulo: Santa Fé do Sul                    | H26 | DZSJRP8696  | KJ147024 |
| <i>Pseudopaludicola mystacalis</i> | Brazil: São Paulo: Santa Fé do Sul                    | H25 | DZSJRP8704  | KJ147022 |
| <i>Pseudopaludicola ameghini</i>   | Brazil: Mato Grosso: Vila Bela da Santíssima Trindade | –   | ZUEC:14146  | KJ147048 |

|                                   |                                                       |   |            |          |
|-----------------------------------|-------------------------------------------------------|---|------------|----------|
| <i>Pseudopaludicola ameghini</i>  | Brazil: Mato Grosso: Vila Bela da Santíssima Trindade | – | ZUEC:13923 | KJ147047 |
| <i>Pseudopaludicola ameghini</i>  | Brazil: Mato Grosso: Chapada dos Guimarães            | – | UFMT:8543  | KJ146976 |
| <i>Pseudopaludicola ameghini</i>  | Brazil: Mato Grosso: Chapada dos Guimarães            | – | ZUEC:14140 | KJ146975 |
| <i>Pseudopaludicola ameghini</i>  | Brazil: Mato Grosso: Vila Bela da Santíssima Trindade | – | ZUEC:13925 | KJ147046 |
| <i>Pseudopaludicola ameghini</i>  | Brazil: Mato Grosso: Vila Bela da Santíssima Trindade | – | ZUEC:13924 | KJ147045 |
| <i>Pseudopaludicola ameghini</i>  | Brazil: Mato Grosso: Chapada dos Guimarães            | – | ZUEC:14138 | KJ146977 |
| <i>Pseudopaludicola boliviana</i> | Argentina: Chaco                                      | – | MLP-DB5614 | KJ147050 |
| <i>Pseudopaludicola boliviana</i> | Argentina: Chaco: San Fernando, Antequera             | – | MLP-DB5186 | KJ147049 |
| <i>Pseudopaludicola canga</i>     | Brazil: Pará: Marabá                                  | – | ZUEC:14334 | KJ146989 |
| <i>Pseudopaludicola canga</i>     | Brazil: Pará: Marabá                                  | – | ZUEC:14333 | KJ146988 |
| <i>Pseudopaludicola facureae</i>  | Brazil: Minas Gerais: Uberlandia                      | – | ZUEC:14175 | KJ146980 |
| <i>Pseudopaludicola facureae</i>  | Brazil: Minas Gerais: Uberlandia                      | – | ZUEC:14173 | KJ146978 |
| <i>Pseudopaludicola falcipes</i>  | Brazil: Rio Grande do Sul: Porto Alegre               | – | ZUEC:14165 | KJ146974 |
| <i>Pseudopaludicola falcipes</i>  | Brazil: Rio Grande do Sul: Porto Alegre               | – | ZUEC:14164 | KJ146973 |
| <i>Pseudopaludicola falcipes</i>  | Brazil: Rio Grande do Sul: Porto Alegre               | – | ZUEC:14162 | KJ146972 |

|                                 |                                            |   |            |          |
|---------------------------------|--------------------------------------------|---|------------|----------|
| <i>Pseudopaludicola mineira</i> | Brazil: Minas Gerais: Serra do Cipó        | – | DZSJRP6437 | KJ147025 |
| <i>Pseudopaludicola mineira</i> | Brazil: Minas Gerais: Serra do Cipó        | – | ZUEC:14318 | KJ147026 |
| <i>Pseudopaludicola murundu</i> | Brazil: São Paulo: Rio Claro               | – | ZUEC:14286 | KJ147032 |
| <i>Pseudopaludicola murundu</i> | Brazil: São Paulo: Rio Claro               | – | CFBH-T1467 | KJ147008 |
| <i>Pseudopaludicola murundu</i> | Brazil: São Paulo: Rio Claro               | – | ZUEC:14284 | KJ147031 |
| <i>Pseudopaludicola murundu</i> | Brazil: São Paulo: Rio Claro               | – | ZUEC:14288 | KJ147030 |
| <i>Pseudopaludicola saltica</i> | Brazil: Mato Grosso: Chapada dos Guimarães | – | ZUEC:14240 | KJ147003 |
| <i>Pseudopaludicola saltica</i> | Brazil: Mato Grosso: Chapada dos Guimarães | – | ZUEC:14239 | KJ147002 |
| <i>Pseudopaludicola saltica</i> | Brazil: Minas Gerais: Uberlandia           | – | ZUEC:14292 | KJ146995 |
| <i>Pseudopaludicola saltica</i> | Brazil: Minas Gerais: Uberlandia           | – | ZUEC:14291 | KJ146994 |
| <i>Pseudopaludicola saltica</i> | Brazil: Mato Grosso: Chapada dos Guimarães | – | ZUEC:14241 | KJ147004 |
| <i>Pseudopaludicola saltica</i> | Brazil: Minas Gerais: Uberlandia           | – | ZUEC:14294 | KJ146993 |
| <i>Pseudopaludicola serrana</i> | Brazil: Minas Gerais: Serra da Moeda       | – | ZUEC:19553 | KJ147053 |
| <i>Pseudopaludicola serrana</i> | Brazil: Minas Gerais: Serra da Moeda       | – | ZUEC:19554 | KJ147052 |
| <i>Pseudopaludicola serrana</i> | Brazil: Minas Gerais: Serra da Moeda       | – | ZUEC:19556 | KJ147051 |



|                                  |                                       |   |            |          |
|----------------------------------|---------------------------------------|---|------------|----------|
| <i>Pseudopaludicola ternetzi</i> | Brazil: Minas Gerais: Uberlandia      | – | SMRP 266.6 | KJ147043 |
| <i>Pseudopaludicola ternetzi</i> | Brazil: Minas Gerais: Uberlandia      | – | ZUEC:14172 | KJ147042 |
| <i>Pseudopaludicola ternetzi</i> | Brazil: São Paulo: Icém               | – | DZSJRP6446 | KJ147011 |
| <i>Pseudopaludicola ternetzi</i> | Brazil: São Paulo: Icém               | – | DZSJRP6456 | KJ147010 |
| <i>Pseudopaludicola ternetzi</i> | Brazil: Minas Gerais: Uberlandia      | – | ZUEC:14171 | KJ146987 |
| <i>Pseudopaludicola ternetzi</i> | Brazil: Minas Gerais: Uberlandia      | – | ZUEC:14169 | KJ146986 |
| <i>Pseudopaludicola ternetzi</i> | Brazil: Uruaçu: Goiás                 | – | UFMT:15754 | KJ147055 |
| <i>Leptodactylus latrans</i>     | Paraguay: Parque Nacional San Rafael  | – | KU 289191  | DQ158417 |
| <i>Adenomera thomei</i>          | Brazil: Espírito Santo: Mimoso do Sul | – | CFBH10573  | KC603946 |
| <i>Adenomera andreae</i>         | French Guiana: Parare Left            | – | 317AF      | KC520683 |
| <i>Pleurodema diplolister</i>    | Brazil: Ceará: Viçosa do Ceará        | – | CFBH 16144 | JQ937185 |

---

**Table S2.** Primers, respective primer fragments, references, and annealing temperature of 16S mitochondrial gene.

| Primer            | Sequence 5' → 3'            | Reference                   | Annealing |
|-------------------|-----------------------------|-----------------------------|-----------|
| <i>12sL13</i>     | TTAGAAGAGGCAAGTCGTAACATGGTA | Feller and<br>Hedges (1998) | 53°C      |
| <i>16sTitus I</i> | GGTGGCTGCTTTTAGGCC          | Titus and<br>Larson (1996)  | 53°C      |
| <i>16sL2A</i>     | CCAAACGAGCCTAGTGATAGCTGGTT  | Hedges (1994)               | 51°C      |
| <i>16sH10</i>     | TGATTACGCTACCTTTGCACGGT     | Hedges (1994)               | 51°C      |
| <i>16sAR</i>      | CGCCTGTTTATCAAAAACAT        | Palumbi et al.<br>(1991)    | 53°C      |
| <i>16SsBR</i>     | CCGGTCTGAACTCAGATCACGT      | Palumbi et al.<br>(1991)    | 53°C      |

**Table S3.** Molecular variance analysis (AMOVA) of 25 locality of *P. mystacalis*.

| Source of variation                | d.f. | % of variation | Fixation indices            |
|------------------------------------|------|----------------|-----------------------------|
| Among groups                       | 9    | 92.29          | FSC = 0.270 ( $p < 0.001$ ) |
| Among populations<br>within groups | 10   | 2.08           | FST = 0.943 ( $p < 0.001$ ) |
| Within populations                 | 40   | 5.63           | FCT = 0.922 ( $p < 0.001$ ) |

**Table S4.** Pairwise distance of uncorrected p-distance between bGYMC clusters of *P. mystacalis* for the mitochondrial 16S. The last column shows the variation within clusters.

(–) data not available.

|           | A    | B    | C    | D    | E    | F    | G    | H    | I    | J    | Ingroup |
|-----------|------|------|------|------|------|------|------|------|------|------|---------|
| Cluster A |      |      |      |      |      |      |      |      |      |      | 0.000   |
| Cluster B | 0.05 |      |      |      |      |      |      |      |      |      | 0.002   |
| Cluster C | 0.05 | 0.01 |      |      |      |      |      |      |      |      | 0.000   |
| Cluster D | 0.04 | 0.03 | 0.03 |      |      |      |      |      |      |      | 0.003   |
| Cluster E | 0.04 | 0.03 | 0.03 | 0.01 |      |      |      |      |      |      | 0.000   |
| Cluster F | 0.04 | 0.03 | 0.03 | 0.01 | 0.01 |      |      |      |      |      | 0.001   |
| Cluster G | 0.04 | 0.03 | 0.03 | 0.02 | 0.02 | 0.02 |      |      |      |      | 0.001   |
| Cluster H | 0.04 | 0.03 | 0.03 | 0.02 | 0.02 | 0.02 | 0.01 |      |      |      | –       |
| Cluster I | 0.04 | 0.03 | 0.03 | 0.01 | 0.01 | 0.01 | 0.01 | 0.01 |      |      | 0.000   |
| Cluster J | 0.04 | 0.03 | 0.03 | 0.01 | 0.01 | 0.01 | 0.01 | 0.01 | 0.00 |      | 0.002   |
| Cluster K | 0.04 | 0.03 | 0.03 | 0.01 | 0.01 | 0.01 | 0.01 | 0.01 | 0.00 | 0.00 | 0.001   |

**Table S5.** Estimates of evolutionary divergence between sequences. The number of base substitutions per site from between sequences are shown. Analyses were conducted using the Maximum Composite Likelihood model [1]. This analysis involved 106 nucleotide sequences. All ambiguous positions were removed for each sequence pair (pairwise deletion option). There were a total of 1303 positions in the final dataset. Evolutionary analyses were conducted in MEGA X [2].

1. Tamura K., Nei M., and Kumar S. (2004). Prospects for inferring very large phylogenies by using the neighbor-joining method. *Proceedings of the National Academy of Sciences (USA)* 101:11030-11035.
2. Kumar S., Stecher G., Li M., Knyaz C., and Tamura K. (2018). MEGA X: Molecular Evolutionary Genetics Analysis across computing platforms. *Molecular Biology and Evolution* 35:1547-1549.

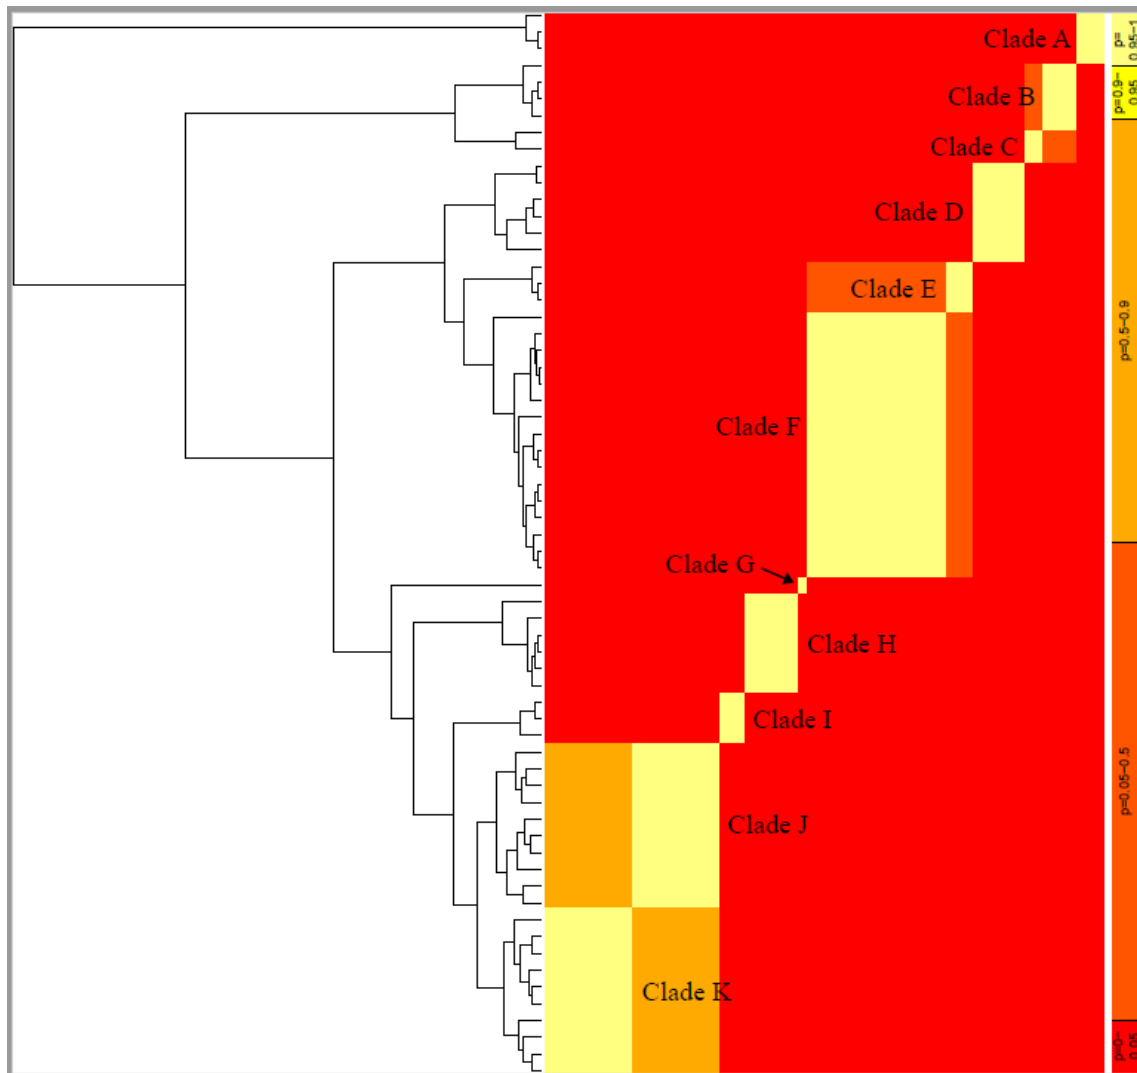

**Figure S1.** Heatmap of the Bayesian implementation of the general mixed yule-coalescent (bGYMC) for *P. mystacalis* samples. Recovered clusters are represented by yellow blocks. The scale on the right shows the correspondent posterior probability for each colour.

**Figure S2.** Bayesian reconstruction of the 16S gene tree of phylogenetic relationships between *P. mystacalis* and other species of *Pseudopaludicola*. Node numbers are posterior probabilities.

## References

- Feller, A.E., Hedges, S.B. (1998): Molecular evidence for the early history of living amphibians. *Mol. Phylogenetics Evol.* **9**: 509–516.
- Hedges, S. B. (1994): Molecular evidence for the origin of birds. *Proceedings of the Acad. Nat. Sci.* **91**: 2621–2624.
- Palumbi, S.R., Martins, A., Romano, S., Mc-Millan, W.O., Stice, L., Grabawski, G. (1991): *The Simple Fool's Guide to PCR, version 2.0*. Honolulu: University of Hawaii, Privately published, compiled by S. Palumbi.
- Titus, T.A., Larson, A. (1996): Molecular phylogenetics of desmognathine salamanders (Caudata: Plethodontidae): A reevaluation of evolution in ecology, life history, and morphology. *Syst. Biol.* **45**: 451–472.
