# Supplementary material
Source: publisher figshare collection journal article supplement (https://brill.figshare.com/articles/dataset/_/20471541)

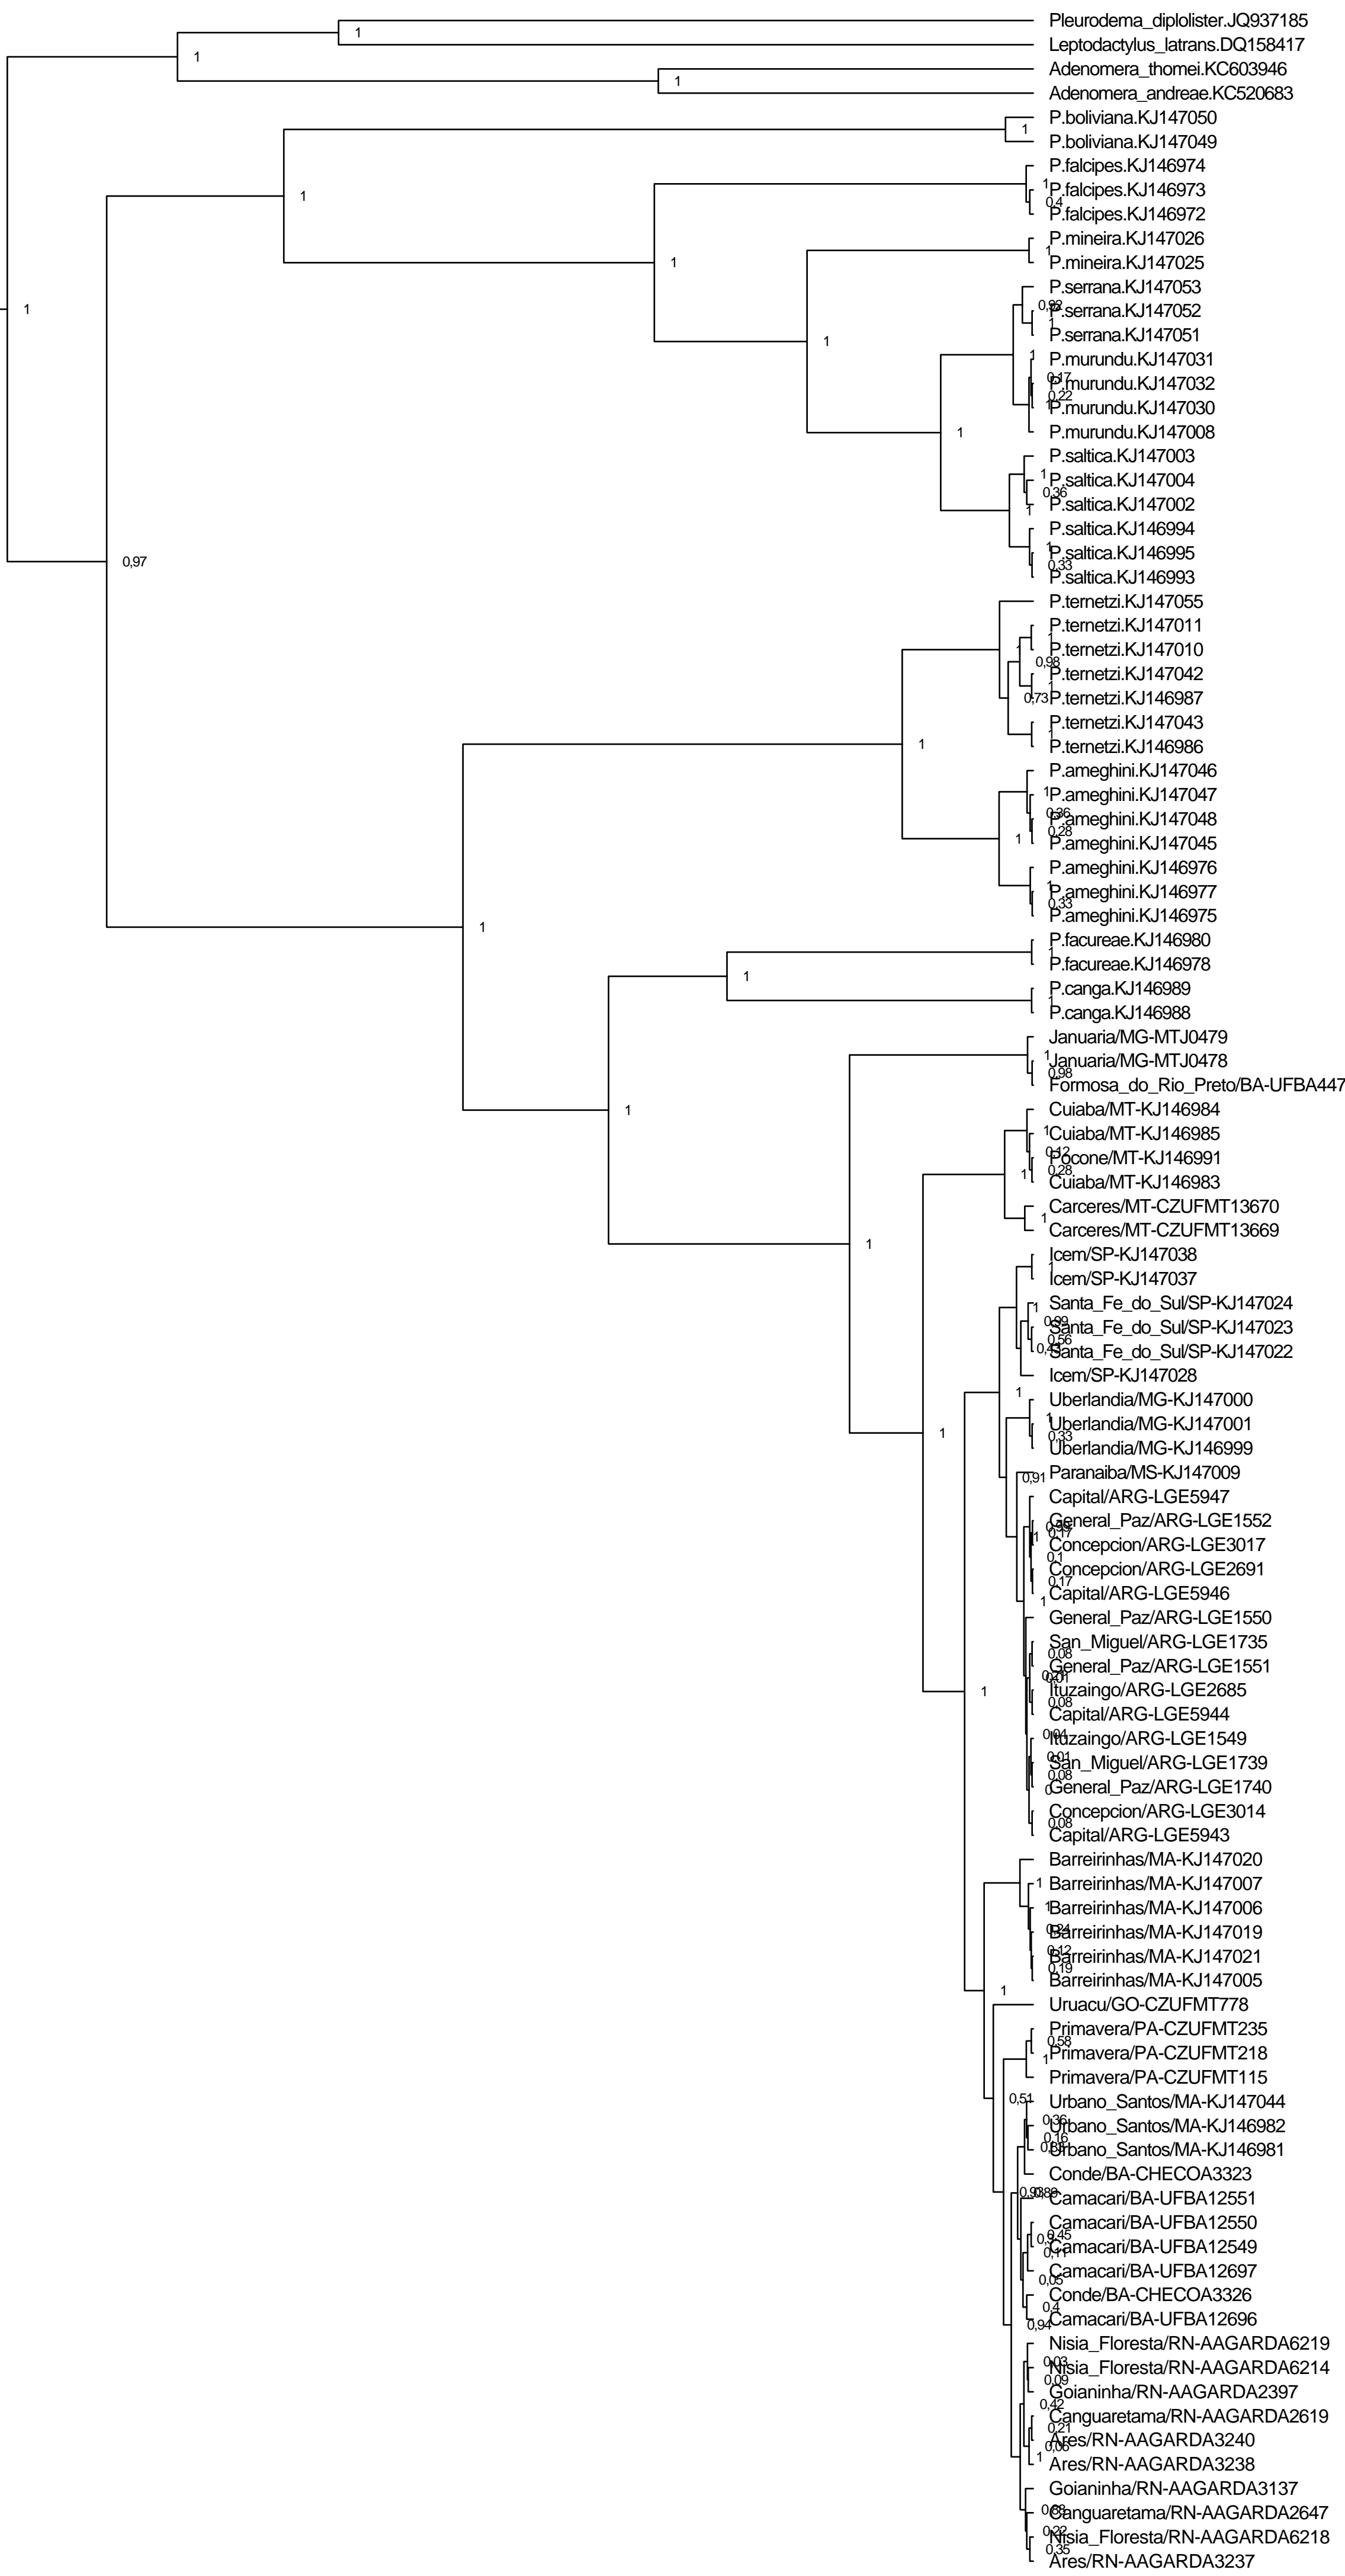

0.03

Supplement: Supplementary file 1 [file 1]
